# Supplementary material for: Long Time No Hear, Magnificent Wohlfahrtia! Morphological and Molecular Evidence of Almost Forgotten Flesh Fly in Serbia and Western Balkans
Source: MDPI journal article supplement (doi:10.3390/microorganisms12020233), 2024-01-23
Supplement: s1 [file s1]

## Supplementary material – Figure S2

### Long time no hear, magnificent *Wohlfahrtia*! Morphological and molecular evidence of almost forgotten flesh fly in Serbia and Western Balkans

Stanislav Simin<sup>1,\*</sup>, Snežana Tomanović<sup>2</sup>, Ratko Sukara<sup>2</sup>, Marijana Stefanov<sup>1</sup>, Milan Savović<sup>3</sup>, Bojan Gajić<sup>4</sup> and Vesna Lalošević<sup>1</sup>

<sup>1</sup>University of Novi Sad, Faculty of Agriculture, Department of Veterinary Medicine, Trg Dositeja Obradovića 8, 21000 Novi Sad, Serbia; stanislav.simin@polj.edu.rs, marijana.stefanov96@gmail.com, lvesna@polj.uns.ac.rs

<sup>2</sup>University of Belgrade, Institute for Medical Research- National Institute of Republic of Serbia, Group for Medical Entomology, Centre of Excellence for Food- and Vector-Borne Zoonoses, 11129 Belgrade, Serbia; snezanat@imi.bg.ac.rs, ratko.sukara@imi.bg.ac.rs

<sup>3</sup>Private Veterinary Practice „MSV Medicus“, Milice Stojadinović Srpkinja 1, 21209 Bukovac, Serbia; msvmedicus@gmail.com

<sup>4</sup>United Arab Emirates University, College of Agriculture and Veterinary Medicine, Department of Veterinary Medicine, P.O. Box 15551, Al Ain, United Arab Emirates; b.gajic@uaeu.ac.ae

\*Correspondence: stanislav.simin@polj.edu.rs

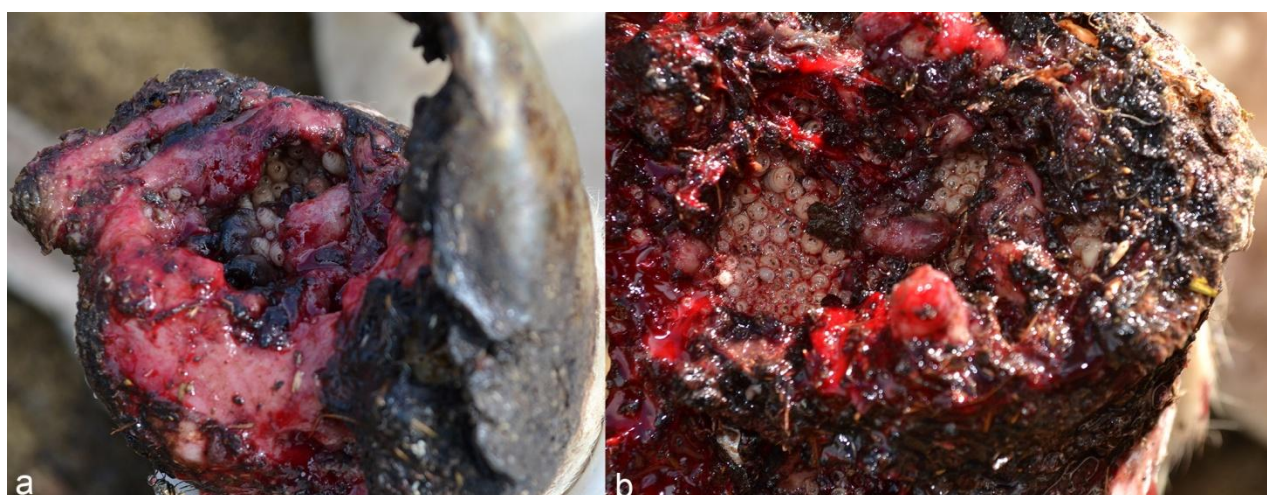

**Figure S2.** Traumatic myiasis of hooves. a) hind leg (ewe ID: 463640); b) front leg (ewe ID: 2505).
