# Supplementary material for: Long Time No Hear, Magnificent Wohlfahrtia! Morphological and Molecular Evidence of Almost Forgotten Flesh Fly in Serbia and Western Balkans
Source: MDPI journal article supplement (doi:10.3390/microorganisms12020233), 2024-01-23
Supplement: s1 [file s1]

# Supplementary material – Table S1

## Long time no hear, magnificent *Wohlfahrtia*! Morphological and molecular evidence of almost forgotten flesh fly in Serbia and Western Balkans

Stanislav Simin<sup>1,\*</sup>, Snežana Tomanović<sup>2</sup>, Ratko Sukara<sup>2</sup>, Marijana Stefanov<sup>1</sup>, Milan Savović<sup>3</sup>, Bojan Gajić<sup>4</sup> and Vesna Lalošević<sup>1</sup>

<sup>1</sup>University of Novi Sad, Faculty of Agriculture, Department of Veterinary Medicine, Trg Dositeja Obradovića 8, 21000 Novi Sad, Serbia; stanislav.simin@polj.edu.rs, marijana.stefanov96@gmail.com, lvesna@polj.uns.ac.rs

<sup>2</sup>University of Belgrade, Institute for Medical Research- National Institute of Republic of Serbia, Group for Medical Entomology, Centre of Excellence for Food- and Vector-Borne Zoonoses, 11129 Belgrade, Serbia; snezanat@imi.bg.ac.rs, ratko.sukara@imi.bg.ac.rs

<sup>3</sup>Private Veterinary Practice „MSV Medicus“, Milice Stojadinović Srpkinja 1, 21209 Bukovac, Serbia; msvmedicus@gmail.com

<sup>4</sup>United Arab Emirates University, College of Agriculture and Veterinary Medicine, Department of Veterinary Medicine, P.O. Box 15551, Al Ain, United Arab Emirates; b.gajic@uaeu.ac.ae

\*Correspondence: stanislav.simin@polj.edu.rs

**Table S1.** The list of available veterinary medications for treatment of wohlfahrtiosis in Western Balkan countries.

| Country                             | Macrocyclic lactones                                        | Organophosphates | Insect growth regulators | Pyrethroids                |
|-------------------------------------|-------------------------------------------------------------|------------------|--------------------------|----------------------------|
| Albania <sup>a</sup>                | Abamectin, Ivermectin                                       | Diazinon, Phoxim | /                        | Cypermethrin, Deltamethrin |
| Bosnia and Herzegovina <sup>b</sup> | Ivermectin                                                  | Diazinon         | /                        | /                          |
| Croatia <sup>c</sup>                | Abamectin, Doramectin, Eprinomectin, Ivermectin, Moxidectin | Diazinon, Phoxim | /                        | Deltamethrin               |
| Montenegro <sup>d</sup>             | Ivermectin                                                  | Diazinon         | /                        | /                          |
| North Macedonia <sup>e</sup>        | Abamectin, Ivermectin                                       | Diazinon, Phoxim | /                        | Cypermethrin, Deltamethrin |
| Serbia <sup>f</sup>                 | Doramectin, Eprinomectin, Ivermectin                        | Diazinon, Phoxim | /                        | Deltamethrin               |

<sup>a</sup> <https://bujqesia.gov.al/lista-e-produkteve-mjekesore-veterinare-te-regjistruara-ne-republiken-e-shqiperise/>

<sup>b</sup> <https://www.vet.gov.ba/bs/registri/c241>

<sup>c</sup> <http://www.veterinarstvo.hr/default.aspx?id=140>

<sup>d</sup> <https://cinmed.me/registar-veterinarskih-ljekova/#anchor-id>

<sup>e</sup> <https://fva.gov.mk/mk/registri-veterinarno-medicinski-preparati>

<sup>f</sup> <https://www.alims.gov.rs/english/veterinary-medicines/search-for-veterinary-medicines/>

All web sites were accessed at 11<sup>th</sup> of November 2023.
